# Supplementary material for: Correction to: The N6-methyladenosine modification of circALG1 promotes the metastasis of colorectal cancer mediated by the miR-342-5p/PGF signalling pathway
Source: PubMed Central journal article supplement (PMC9020055; doi:10.1186/s12943-022-01571-3), 2022-04-20

**A**

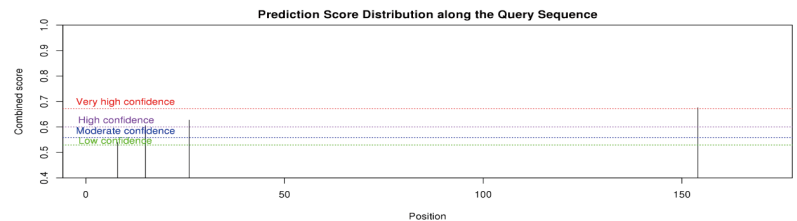

| # | Position | Sequence context                                              | Structural context | Local structure visualization | Score(binary) | Score(km) | Score(spectrum) | Score(combined) | Decision                                     |
|---|----------|---------------------------------------------------------------|--------------------|-------------------------------|---------------|-----------|-----------------|-----------------|----------------------------------------------|
| 1 | 8        | -----<br>AGUUU GAACA ACUGA<br>CUCUU GAUGG ACACA               | N/A                | N/A                           | 0.461         | 0.151     | 0.695           | 0.539           | m <sup>6</sup> A site (Low confidence)       |
| 2 | 15       | -----<br>--AG UUUGA<br>ACAAC UGACU CUUGA<br>UGGAC ACAAC CUUCC | N/A                | N/A                           | 0.570         | 0.252     | 0.696           | 0.605           | m <sup>6</sup> A site (High confidence)      |
| 3 | 26       | UUGAA CAACU GACUC<br>UUGAU GGACA CAACC<br>UUCU UCUCU CGUCU    | N/A                | N/A                           | 0.582         | 0.424     | 0.714           | 0.627           | m <sup>6</sup> A site (High confidence)      |
| 4 | 154      | ACCCC CUGGC UGGAG<br>GCCGA GGACU ACCCC<br>CUGCU UCUAG -----   | N/A                | N/A                           | 0.737         | 0.793     | 0.578           | 0.676           | m <sup>6</sup> A site (Very high confidence) |

circALG1

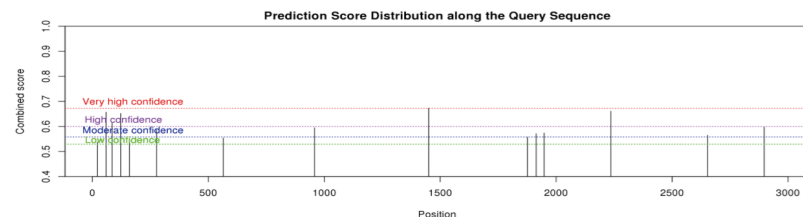

| # | Position | Sequence context                                            | Structural context | Local structure visualization | Score(binary) | Score(km) | Score(spectrum) | Score(combined) | Decision                                |
|---|----------|-------------------------------------------------------------|--------------------|-------------------------------|---------------|-----------|-----------------|-----------------|-----------------------------------------|
| 1 | 22       | -UCAU UGAAG UCAAC<br>AAGAG AGACA UAGUC<br>UUCUU GGUUG AUGGC | N/A                | N/A                           | 0.494         | 0.508     | 0.600           | 0.537           | m <sup>6</sup> A site (Low confidence)  |
| 2 | 59       | UGSAU GGCUC AUCUG<br>CACUG GGACU GGCCA<br>ACUUC AAUGC CAUCC | N/A                | N/A                           | 0.68          | 0.567     | 0.637           | 0.657           | m <sup>6</sup> A site (High confidence) |
| 3 | 85       | GCCAA CUUCA AUGCC<br>AUCCG AGACU UCAUU<br>GCUAA AGUCA UCCAG | N/A                | N/A                           | 0.565         | 0.680     | 0.671           | 0.613           | m <sup>6</sup> A site (High confidence) |
| 4 | 122      | UCAUC CAGAG GCUGG<br>AAAUU GGACA GGAUC<br>UUAUC CAGGU GGCAG | N/A                | N/A                           | 0.585         | 0.555     | 0.757           | 0.652           | m <sup>6</sup> A site (High confidence) |

circCOL6A3

**B**

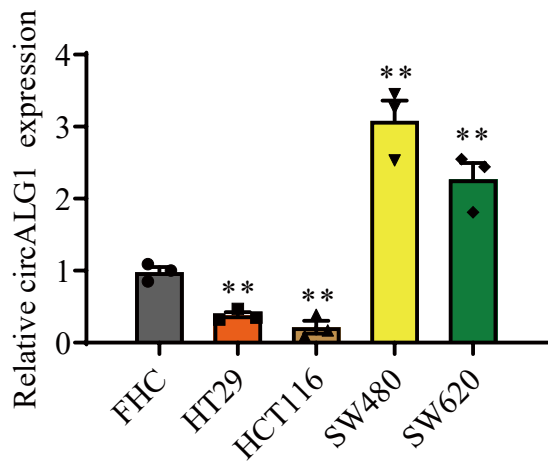

**C**

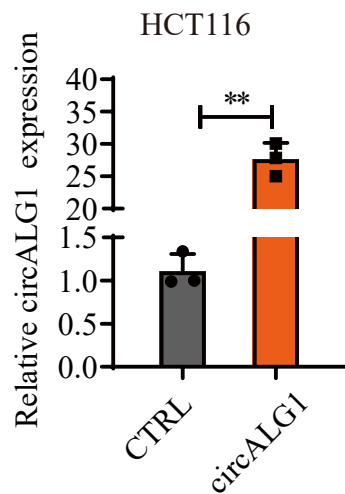

**D**

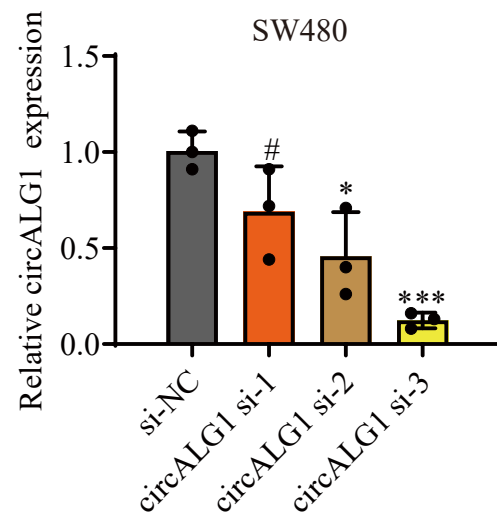

Supplement: 12943_2022_1571_MOESM1_ESM.pdf [file 12943_2022_1571_MOESM1_ESM.pdf]
