# Supplementary material for: Correction to: The N6-methyladenosine modification of circALG1 promotes the metastasis of colorectal cancer mediated by the miR-342-5p/PGF signalling pathway
Source: PubMed Central journal article supplement (PMC9020055; doi:10.1186/s12943-022-01571-3), 2022-04-20
Supplement: 12943_2022_1571_MOESM3_ESM.pdf [file 12943_2022_1571_MOESM3_ESM.pdf]

**A**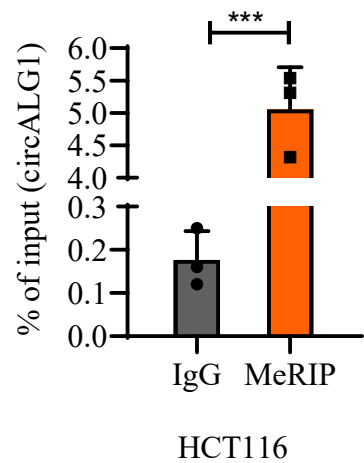**B**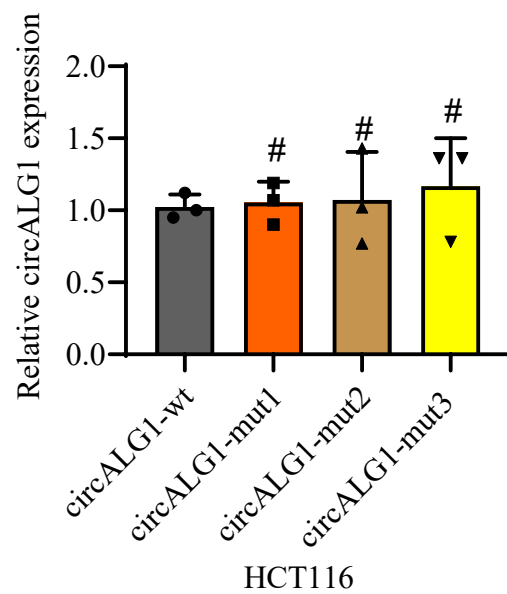**C**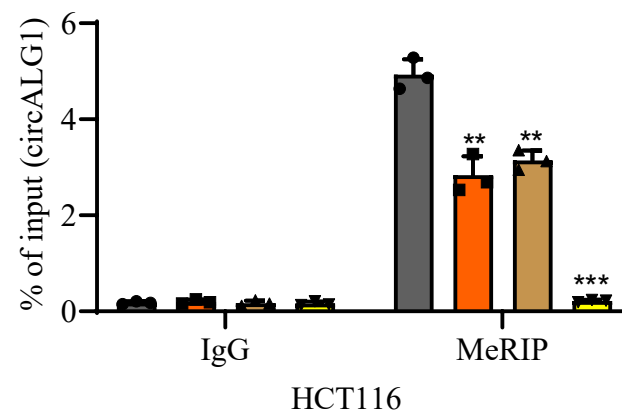**D**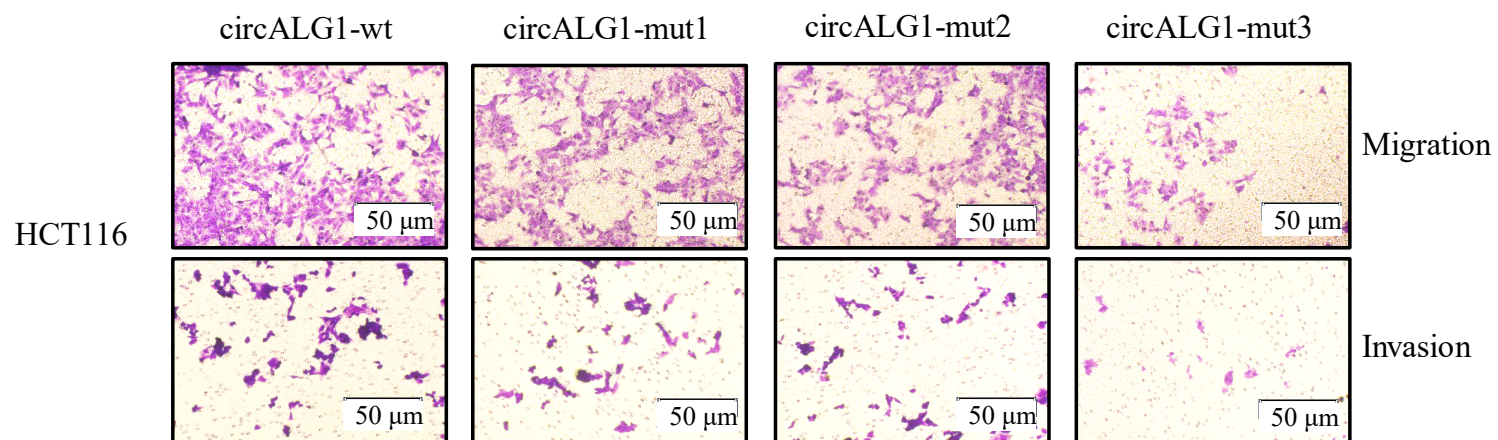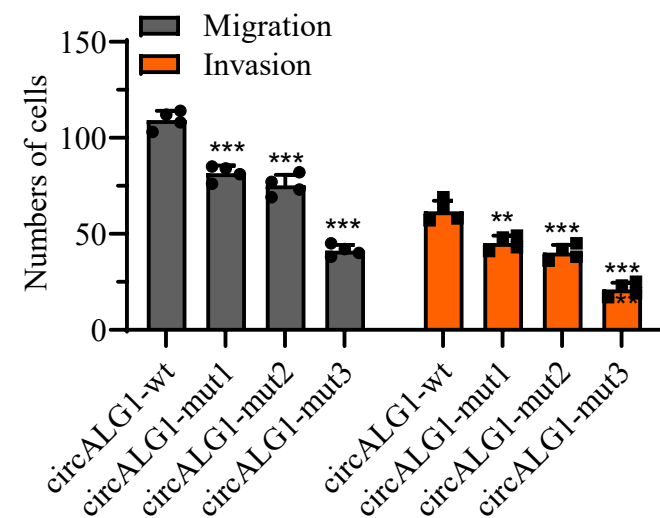

HCT116
